# Supplementary material for: Zoledronate blocks geranylgeranylation not farnesylation to suppress human osteosarcoma U2OS cells metastasis by EMT via Rho A activation and FAK-inhibited JNK and p38 pathways
Source: PubMed Central journal article supplement (PMC4891081; doi:10.18632/oncotarget.7138), 2016-02-02
Supplement: oncotarget-07-09742-s001.pdf [file oncotarget-07-09742-s001.pdf]

## SUPPLEMENTARY FIGURE

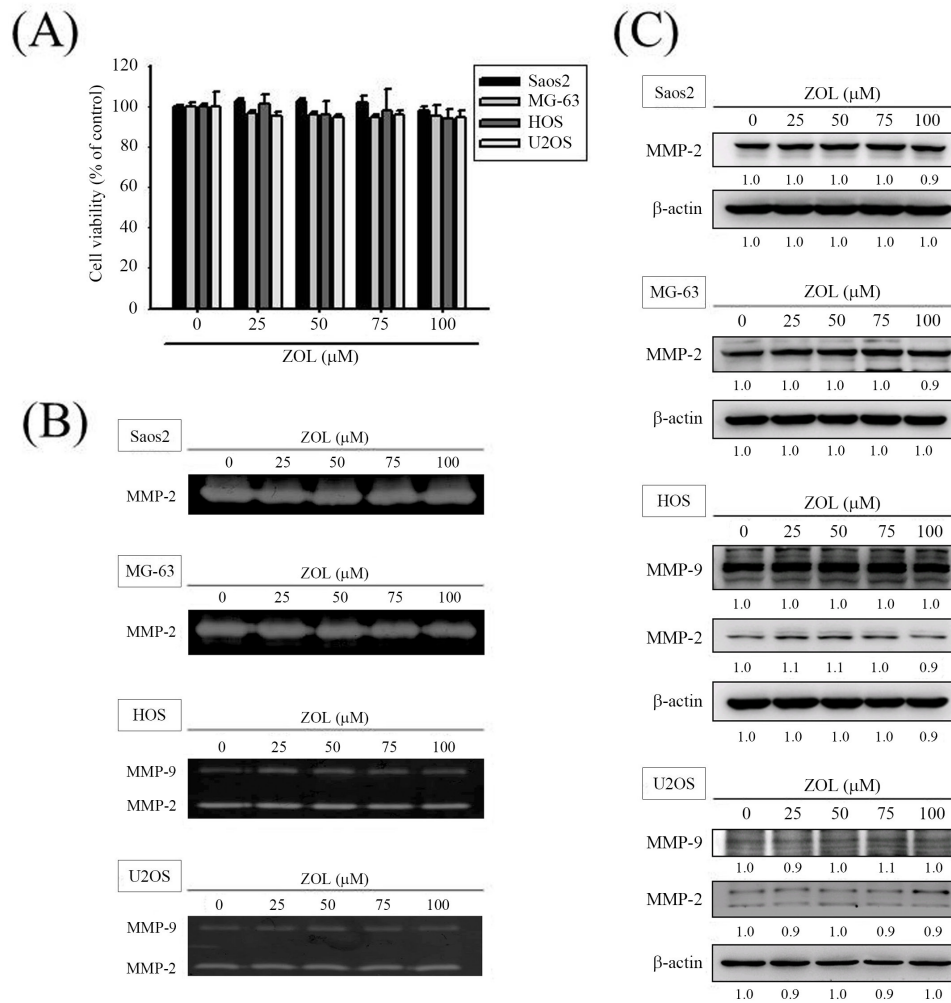

**Supplementary Figure S1: Effects of zoledronate on cell viability and gelatinases in 4 osteosarcoma (Saos2, MG-63, HOS and U2OS) cells.** **A.** Four osteosarcoma cells were treated with zoledronate (0, 25, 50, 75 and 100  $\mu$ M) for 24 h before being subjected to a MTT assay for cell viability. Analysis of variance was used. Saos2:  $F = 3.086$ ,  $p = 0.068$ ; MG-63:  $F = 2.536$ ,  $p = 0.084$ ; HOS:  $F = 1$ ,  $p = 0.486$ ; U2OS:  $F = 0.392$ ,  $p = 0.81$ . **B.** Activities and **C.** protein expressions of MMP-2 and MMP-9 after different concentrations (0, 25, 50, 75, and 100  $\mu$ M) of zoledronate treatment in 4 osteosarcoma cells were measured by gelatin zymography and western blot analysis, respectively.
